# Supplementary material for: Heat shock factor 2 is a stress-responsive mediator of neuronal migration defects in models of fetal alcohol syndrome
Source: PubMed Central journal article supplement (PMC4154132; doi:10.15252/emmm.201303311), 2014-07-15

Source data Suppl. Figure S8 & F El Fatimy et al.

Raw data EMSA gel Fig S8 (lanes indicated by frame)

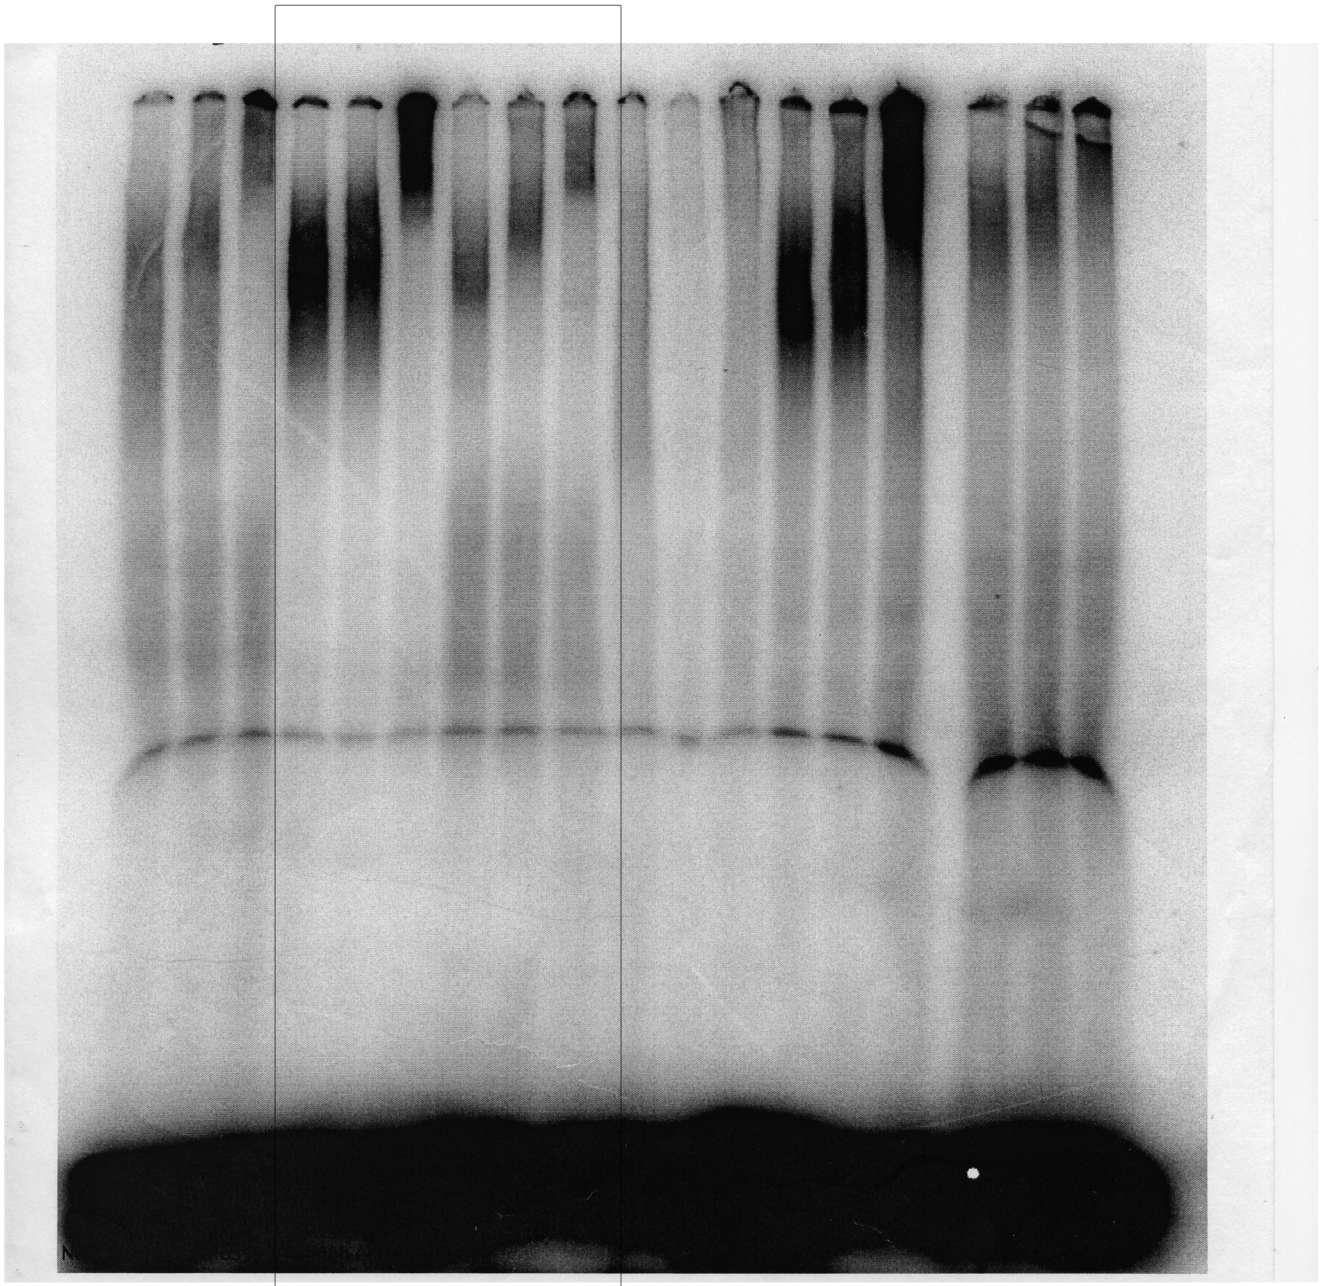

Supplement: emmm0006-1043-sd7.pdf [file emmm0006-1043-sd7.pdf]
