# Supplementary material for: Heat shock factor 2 is a stress-responsive mediator of neuronal migration defects in models of fetal alcohol syndrome
Source: PubMed Central journal article supplement (PMC4154132; doi:10.15252/emmm.201303311), 2014-07-15
Supplement: emmm0006-1043-sd8.pdf [file emmm0006-1043-sd8.pdf]

Source data Suppl. Figure S9 A El Fatimy

Raw data WB HSF2 EGS crosslinking left-upper panel

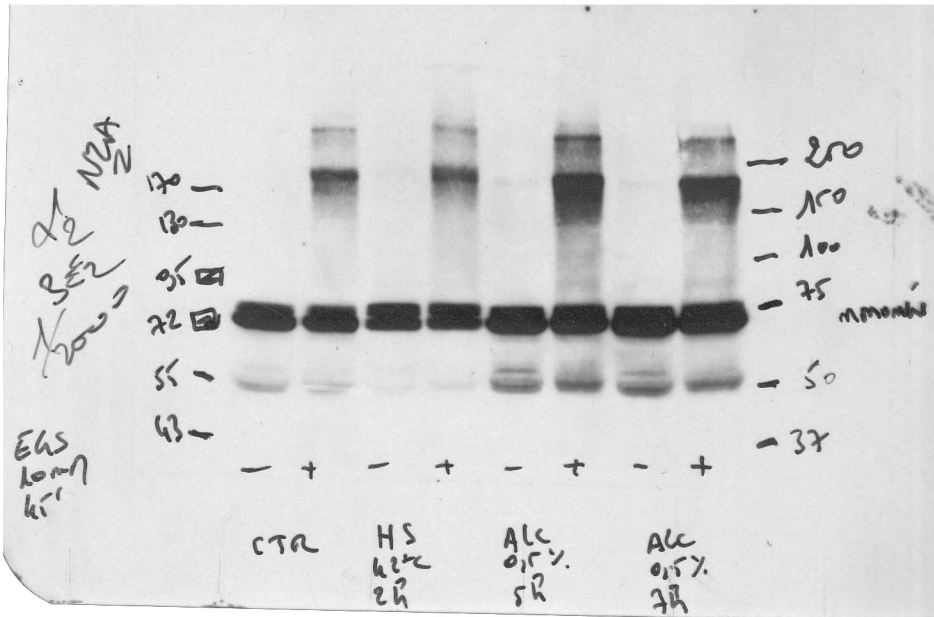

Raw data WB HSF2 EGS crosslinking left-lower panel (shorter exposure)

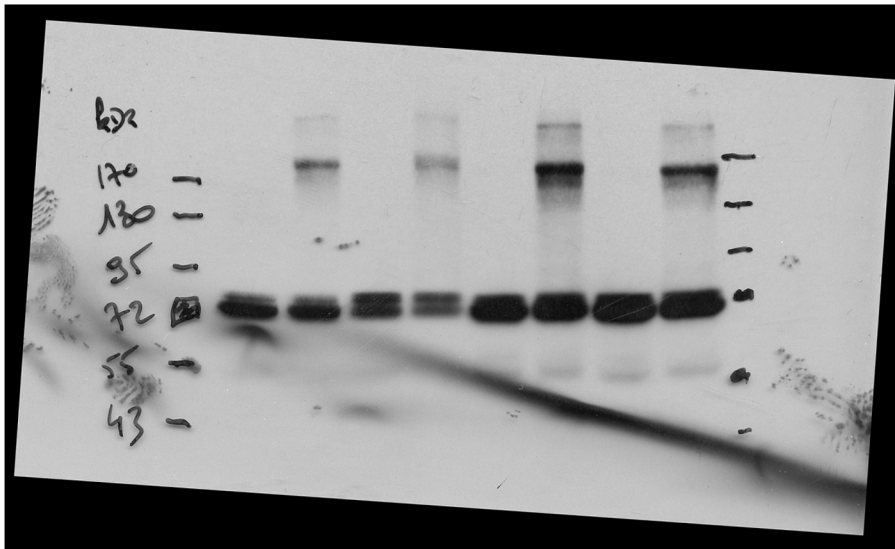

Raw data HSF1 WB EGS crosslinking right panel

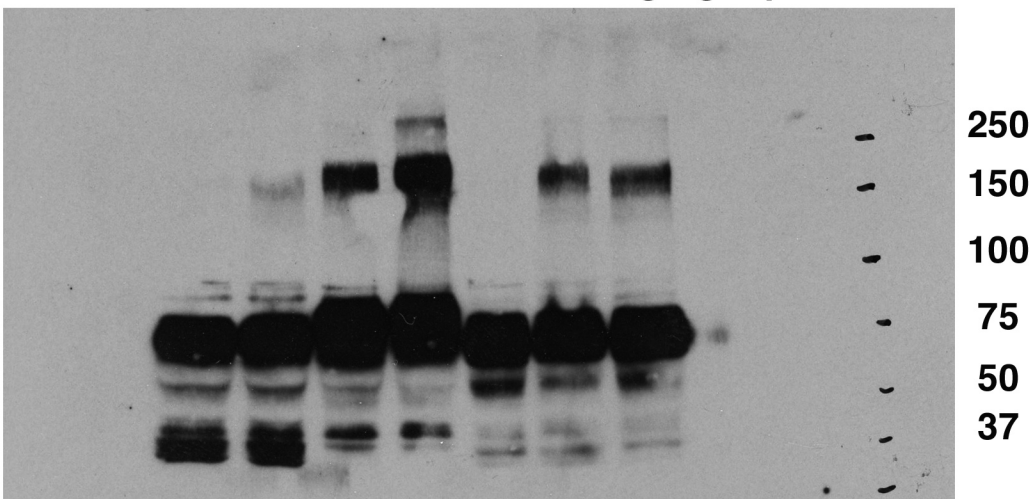

# Source data Suppl. Figure S9B El Fatimy

## Raw data WB EGS crosslinking S9B

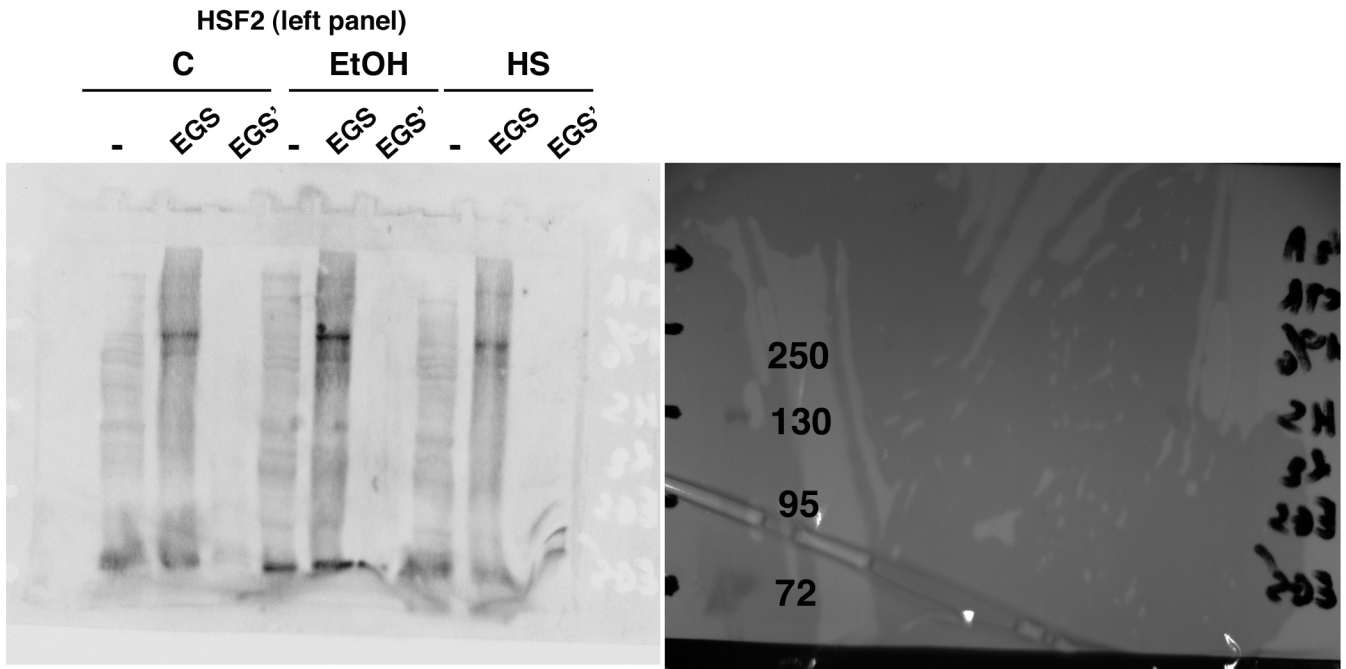

EGS & EGS' = 2 different batches of EGS  
from 2 Manufacturers

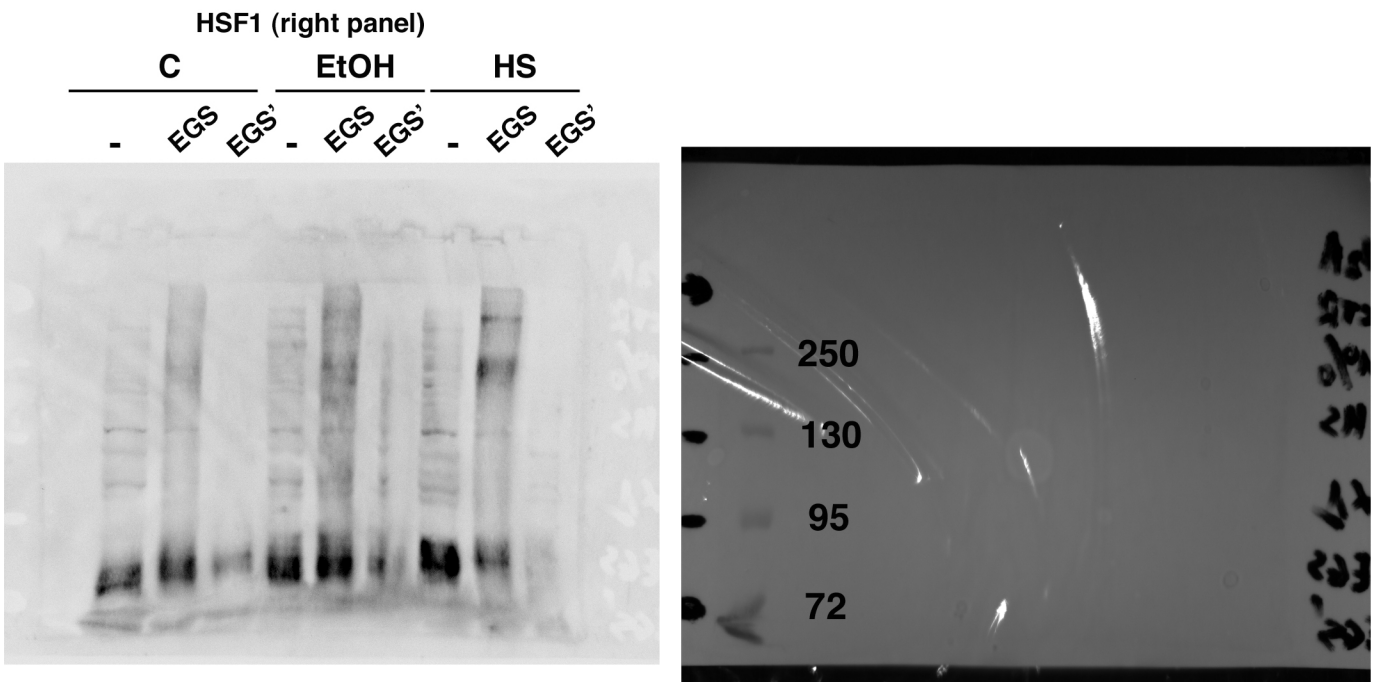

# Source data Suppl. Figure S9C El Fatimy

## Raw data WB EGS crosslinking S9C

EGS (mM)      HSF2 (left panel)  
- 10 20 - 10 20

EGS (mM)      HSF1 (right panel)  
- 10 20 - 10 20

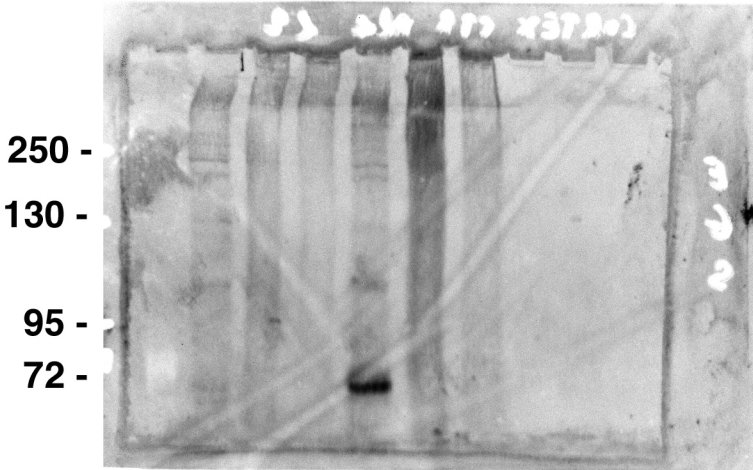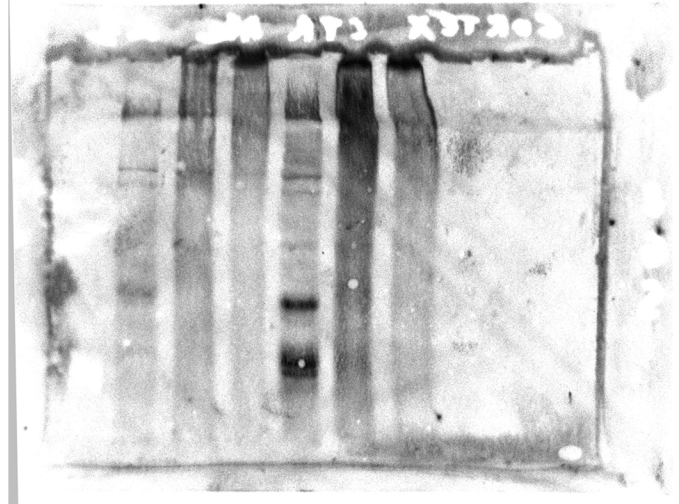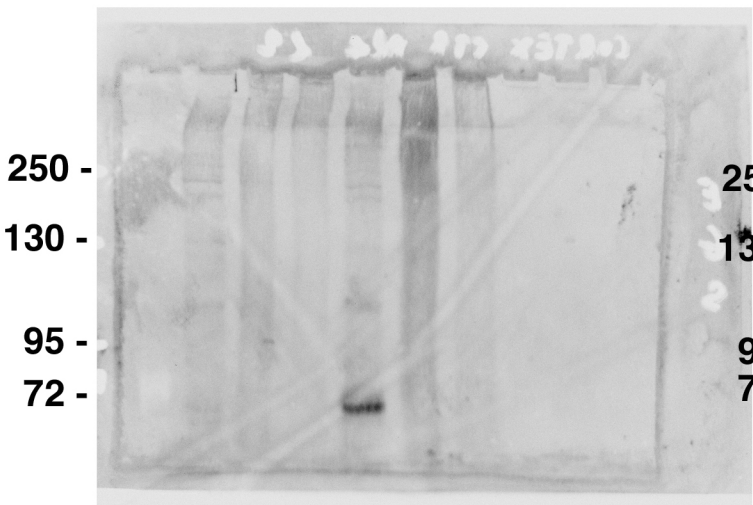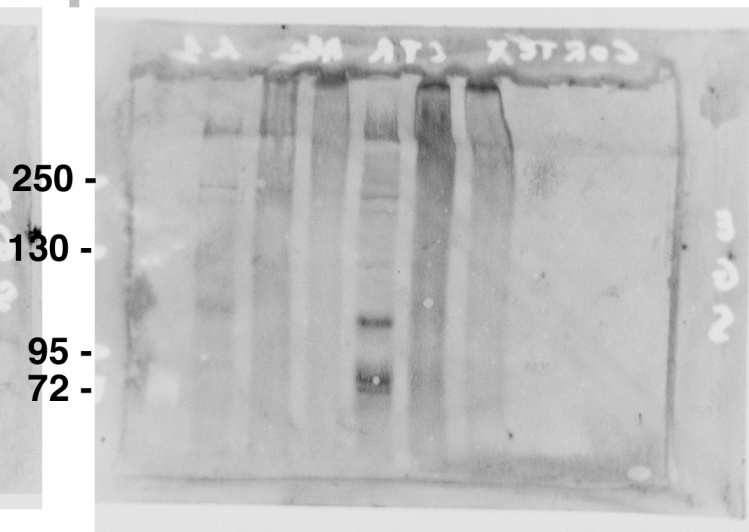

(same membranes - lower exposure)
