# Supplementary material for: Heat shock factor 2 is a stress-responsive mediator of neuronal migration defects in models of fetal alcohol syndrome
Source: PubMed Central journal article supplement (PMC4154132; doi:10.15252/emmm.201303311), 2014-07-15

Raw data EMSA Figure 1B

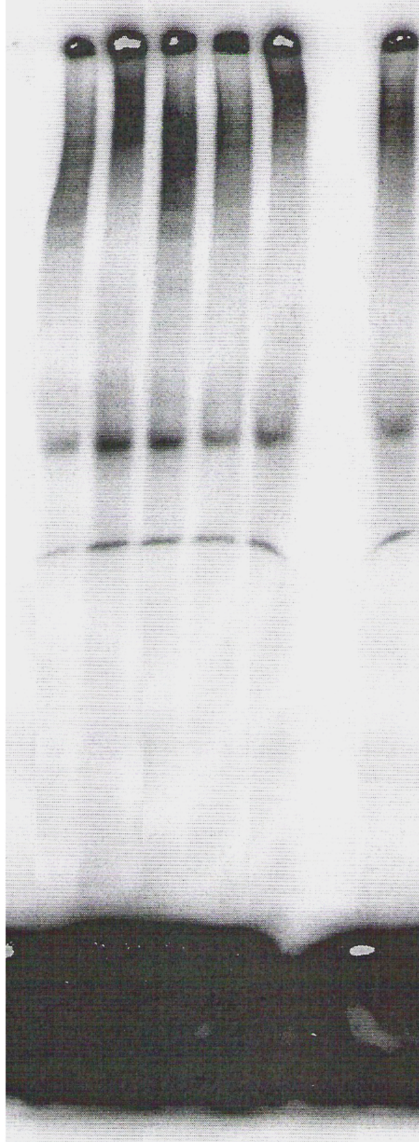

Supplement: emmm0006-1043-sd11.pdf [file emmm0006-1043-sd11.pdf]
